# Supplementary material
Source: PubMed Central journal article supplement (PMC3286812)
Supplement: Supp_Data.pdf [file Supp_Data.pdf]

## Supplementary Data

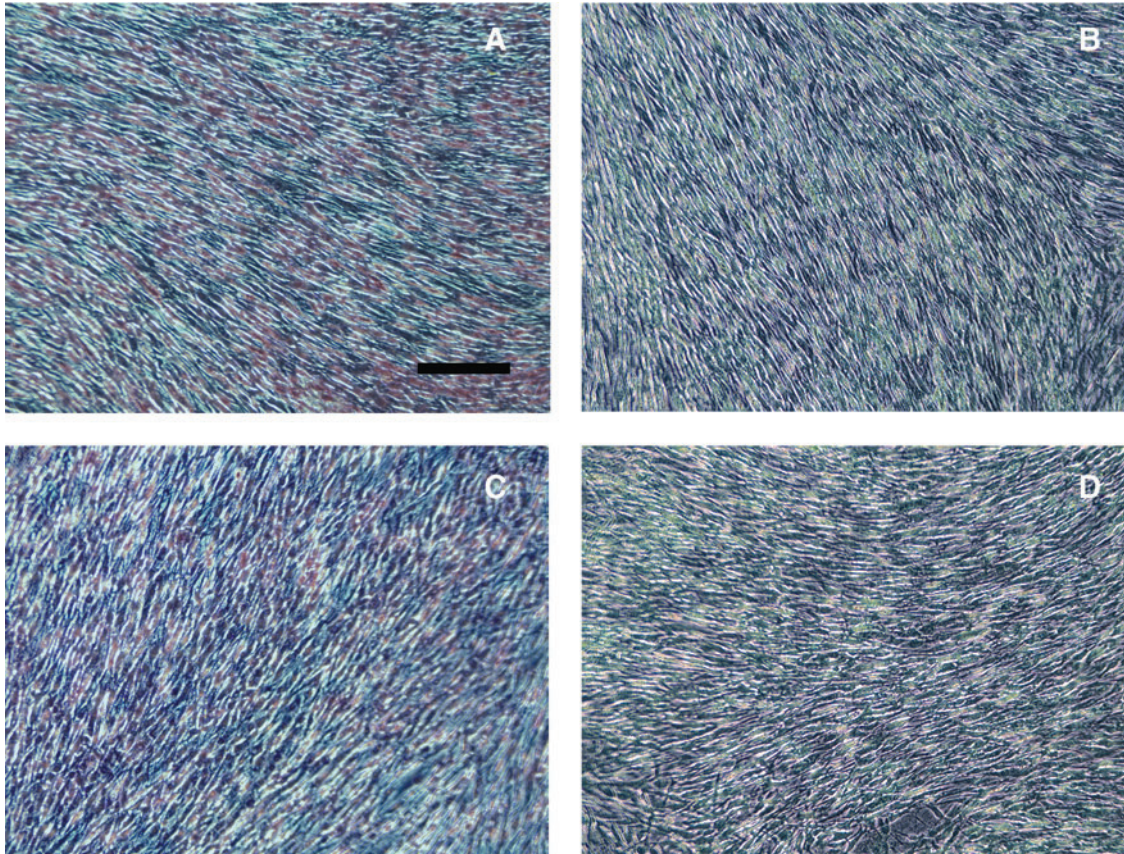

**SUPPLEMENTARY FIG. S1.** Photographs showing the production of (A, C) collagenous and (B, D) non-collagenous proteins in hTDSCs maintained at 20% oxygen ( $O_2$ ) tension until confluence and subsequently incubated at (A, B) 20% or (C, D) 2%  $O_2$  tension for 7 days as indicated by Sirius Red F3BA and Fast Green FCF staining, respectively. Scale bar: 50 $\mu$ m. N=5/group at 20% and N=6/group at 2%  $O_2$  tension. hTDSCs, human tendon-derived stem cells.
